1 **Spontaneous alpha and theta oscillations are related to complementary aspects of**  
2 **cognitive control in younger and older adults**

3 Grace M. Clements<sup>1,2</sup>, Daniel C. Bowie<sup>1,2</sup>, Mate Gyurkovics<sup>1</sup>, Kathy A. Low<sup>1</sup>,  
4 Monica Fabiani<sup>1,2</sup>, & Gabriele Gratton<sup>1,2\*</sup>

5 <sup>1</sup> Beckman Institute, University of Illinois at Urbana-Champaign, IL, 61801, USA

6 <sup>2</sup> Psychology Department, University of Illinois at Urbana-Champaign, IL, 61820, USA

7 **Abbreviated title:** Resting-state EEG and cognitive control

8

9 **\* Correspondence:**

10 Prof. Gabriele Gratton

11 [grattong@illinois.edu](mailto:grattong@illinois.edu)

12

13 **Keywords:** EEG alpha power, EEG theta power, cognitive control, proactive control, reactive control,  
14 aging

15

16

17 Number of figures: 4

18 Number of tables: 1

19 Number of words for abstract: 271

20 Number of words for manuscript: 8173

21

## Resting-state EEG and cognitive control

### 22 **Abstract**

23 The resting-state human EEG power spectrum is dominated by alpha (8-12 Hz) and theta (4-8Hz)  
24 oscillations, and also includes non-oscillatory broadband activity inversely related to frequency ( $1/f$   
25 activity). Gratton (2018) proposed that alpha and theta oscillations are both related to cognitive control  
26 function, though in a complementary manner. Alpha activity is hypothesized to facilitate the  
27 *maintenance* of representations, such as task sets in preparation for *expected* task conditions. In  
28 contrast, theta activity would facilitate *changes* in representations, such as the *updating* of task sets in  
29 response to *unpredicted* task demands. Therefore, theta should be related to reactive control (which  
30 may prompt changes in task representations), while alpha may be more relevant to proactive control  
31 (which implies the maintenance of current task representations). Less is known about the possible  
32 relationship between  $1/f$  activity and cognitive control, which was analyzed here in an exploratory  
33 fashion. To investigate these hypothesized relationships, we recorded eyes-open and eyes-closed  
34 resting-state EEG from younger and older adults and subsequently tested their performance on a cued  
35 flanker task, expected to elicit both proactive and reactive control processes. Results showed that alpha  
36 power and  $1/f$  slope were smaller in older than younger adults, whereas theta power did not show age-  
37 related reductions. Resting alpha power and  $1/f$  slope were predictive of proactive control processes,  
38 whereas theta power was related to reactive control as measured by the cued flanker task. All predictive  
39 associations were present over and above the effect of age, suggesting that these resting-state EEG  
40 correlates could be indicative of trait-like individual differences in cognitive control performance,  
41 which may be already evident in younger adults, and are still similarly present in healthy older adults.

42

43 **Keywords:** EEG alpha power, EEG theta power, cognitive control, proactive control, reactive control,  
44 aging

45

46

## 47 **1. Introduction**

48           Three main features dominate the resting-state EEG power spectrum: alpha oscillations (8-12  
49 Hz; e.g., Hanslmayr, Gross, Klimesch, & Shapiro, 2011; Jensen & Mazaheri, 2010; Mathewson et al.,  
50 2011), theta oscillations (4-8 Hz; e.g., Jaušovec, Jaušovec, & Gerlič, 2001; Pscherer et al., 2019; ) and  
51 non-oscillatory broadband activity inversely related to frequency, known as  $1/f$  slope (e.g., He, 2014).  
52 Other frequency bands have also been identified and investigated, such as beta, gamma, etc., but their  
53 amplitude is smaller. Alpha and theta oscillations have been extensively investigated in relation to  
54 cognition, whereas the relationship between  $1/f$  activity and cognition is emerging (Cavanagh & Frank,  
55 2014; Clayton, Yeung, & Kadosh, 2015; Cohen, 2014; Voytek et al., 2015). Alpha and theta power are  
56 most often measured during tasks to elucidate moment-to-moment neural variability yoked to certain  
57 stimuli or conditions. For instance, posterior alpha has been related to the inhibition of the processing  
58 of visual stimuli (e.g., Jensen & Mazaheri, 2010; Klimesch, Sauseng, & Hansilmayr, 2007; Lőrincz et  
59 al., 2009; Mathewson et al., 2009; 2011) and can be suppressed by incoming visual stimulation that  
60 needs attending (Morrell & Ross, 1953; Williamson et al., 1997). This suggests that alpha may be  
61 related to a processing mode geared at limiting the progression of perceptual information through the  
62 brain to avoid interfering with currently active representations.

63           In contrast, task-related activity in theta power shows marked, short-lived increases in response  
64 to stimuli with high levels of conflict or when task settings require updating (Cavanagh & Frank, 2014;  
65 Cavanagh et al., 2009; Clayton, Yeung, & Kadosh, 2015; Cohen, 2014; Cooper et al., 2016, Cohen &  
66 Donner, 2013). In this context, theta activity may be associated with the adjustment of settings related  
67 to how stimulus information needs to be processed (Cavanagh et al., 2009). Thus, in task-related  
68 conditions, both alpha and theta are thought to be associated with mechanisms regulating the flow of  
69 information, a set of processes often labeled cognitive control (for a review, see Gratton et al., 2018).

## Resting-state EEG and cognitive control

70 Providing a unified view of this evidence for alpha and theta, Gratton (2018) hypothesized that  
71 these oscillations exert complementary roles in cognitive control, with alpha associated with the  
72 maintenance of currently active representations (in order to protect their processing from interference;  
73 *proactive control*, Braver, 2012) and theta associated with the disruption/updating of representations,  
74 when attention needs to shift to incoming information (and alpha is therefore suppressed; *reactive*  
75 *control*, Braver, 2012). While largely proposed on the basis of stimulus-related activity, such  
76 complementary roles for alpha and theta could also occur spontaneously, outside of the influence of  
77 externally defined tasks, and therefore be related to trait-like *individual differences* in cognitive control.  
78 If this were the case, then alpha activity at rest could be *predictive* of the propensity of an individual  
79 to exert proactive control, which requires the maintenance of representations or goal-states. Similarly,  
80 the extent to which theta activity is exhibited at rest could be *predictive* of a person's ability to detect  
81 and resolve interference, and therefore to exert reactive control. In addition, because cognitive control  
82 is known to vary with age (Braver & Barch, 2002, Braver, 2012; Bugg, 2014; Manard, Francois,  
83 Phillips, Salmon, & Collette 2017), we were also interested in determining whether aging would  
84 modulate these hypothesized relationships. Specific evidence for these hypotheses is reviewed in the  
85 remainder of this introduction.

86 *Alpha and theta power at rest.* At rest, alpha power decreases with open eyes and is correlated  
87 with many cognitive processes, including working memory and IQ (Doppelmayr, Klimesch, Stadler,  
88 Pöllhuber, & Heine, 2002; Oswald et al., 2017). Further, it is well documented that alpha power  
89 decreases with age (e.g., Polich, 1997) and also in various stages of clinical impairments as dementia  
90 develops (Babiloni et al., 2006). Healthy older adults have been shown to have greater resting-state  
91 alpha power compared to those with Mild Cognitive Impairment (MCI), and they, in turn, have greater  
92 alpha power than those with Alzheimer's Disease (AD; Moretti et al., 2004; Babiloni et al., 2006).  
93 Thus, resting-state alpha power has already been used as a biomarker for individual differences in older

94 adults, due to its clinical relevance in distinguishing various degrees of age-related cognitive  
95 pathologies. Additionally, Mahjoory et al. (2019) have shown that resting-state alpha power in younger  
96 adults is related to attention span, indicating that alpha at rest may be a useful tool to understand  
97 cognitive variability in younger adults. By-and-large, these data indicate that high resting-state alpha  
98 power is associated with higher cognitive abilities, suggesting that resting-state alpha manifests a brain  
99 mechanism of significant importance for cognition.

100         The relationship between *resting-state* theta activity and cognitive control is less clear.  
101 Pscherer et al. (2019) found that individuals with low eyes-open resting-state theta power had poorly  
102 controlled conflict-related response inhibition during a Go/No-Go task compared to those with high  
103 resting theta power. They also found that participants with low resting-state theta power had more total  
104 task-based theta power on incompatible than compatible trials. This was not true for participants who  
105 had high resting-state theta power. These data suggest that resting theta power (just as theta power  
106 during tasks) is related to inhibitory control, particularly during conflict, and that theta at rest may  
107 predict cognitive control theta activity during a task. Surprisingly, however, theta at rest has also been  
108 negatively associated with lower IQ (Jaušovec, et al., 2001).

109         These seemingly contradictory findings suggest that, although theta oscillations may represent  
110 cognitive-control-related processes even in the absence of a task (but see Gordon et al., 2018), the exact  
111 nature of these processes is still unclear. They may reflect periodic disengagement from established  
112 representations to monitor the environment for changes, or the excessive occurrence of shifting or  
113 updating operations (Miyake & Friedman, 2012), which may characterize highly distractible  
114 individuals. Differently from alpha, the evidence for resting-state theta changes with age is mixed  
115 (Babiloni et al., 2006; Finnigan & Robertson, 2011). Theta power has been reported not to differ  
116 between healthy older adults and individuals with MCI or AD (Babiloni et al., 2006), but also to  
117 undergo a relative *increase* with disease progression (Kwak, 2006).

## Resting-state EEG and cognitive control

118 *1/f activity*. In recent years it has become clear that the resting-state EEG spectrum contains  
119 not only recurrent oscillatory activity, but also activity of a non-recurrent (or non-oscillatory) nature.  
120 These non-oscillatory phenomena typically produce a broadband effect, which is more visible at low  
121 than at high frequencies, likely because the longer the duration of these deflections, the greater their  
122 summation in the EEG spectrum. This type of activity is referred to as *1/f* noise, *1/f* slope or *1/f* activity,  
123 because its power decreases as a function of frequency (*f*) following a power-law function (He, 2014;  
124 Voytek & Knight, 2015). Research on *1/f* slope suggests that it could be related to task performance  
125 and cognitive state (Miller et al., 2015; Ouyang et al., 2020; Pertermann et al., 2019). It has also been  
126 recently shown that *1/f* may be affected by age (Voytek et al., 2015; Dave et al., 2018;). Because *1/f*  
127 is a substantial component of the resting EEG power spectrum, and may vary with age, we decided it  
128 would be important to separately estimate its role and predictive value in a set of exploratory analyses.  
129 Crucially, separating *1/f* from the remainder of the spectrum is important to accurately estimate the  
130 power of oscillatory activity such as alpha and theta (Haegens, Cousijn, Wallis, Harrison, Nobre, 2014;  
131 Nikulin & Brismar, 2006; Voytek et al., 2015).

132 *Assessment of proactive and reactive control*. To provide an independent assessment of an  
133 individual's ability to exert proactive and reactive cognitive control, we employed a cued flanker task  
134 (Eriksen & Eriksen, 1974). In a flanker paradigm, a central target stimulus is flanked by irrelevant  
135 distractors that are either congruent (e.g., >>>> or <<<<<) or incongruent with the target (e.g., <<<<<  
136 or >>>>>). The participant's task is to ignore the flankers and respond based on the direction of the  
137 central arrow. In the *cued* version of this paradigm used in the current study, the reaction stimulus  
138 arrays are preceded by a cue that indicates the probability that the array will contain congruent flankers.  
139 The difference in performance between incongruent and congruent trials, known as the *congruency*  
140 *effect* (CE), reflects the extent to which distractor information is processed up to the point it influences  
141 responses. The less the distractor information is processed, the smaller the congruency effect, which

142 is taken as a measure of *reactive control*. Smaller congruency effects indicate more effective reactive  
143 control.

144 Gratton, Coles, & Donchin (1992) showed that probability cues influence the size of the  
145 congruency effect, with cues indicating a high probability of congruency leading to larger congruency  
146 effects. In other words, when participants are warned that distractors are likely to be incongruent, they  
147 adopt a strategy that limits the influence of the distractor information, reducing the congruency effect.  
148 In contrast, when they are informed that irrelevant distractors are likely to be congruent, they adopt a  
149 strategy that allows for more distractor information to be processed, because on the majority of trials  
150 this information will facilitate performance. This is of course at the cost of hindering performance on  
151 the infrequent incongruent arrays, leading to a larger congruency effect in such instances. These effects  
152 are similar to the conflict adaptation effect (also called the congruency sequence effect, or the Gratton  
153 effect) which is characterized by a reduced congruency effect on trials immediately following an  
154 incongruent, as opposed to a congruent, array (e.g., Egner, 2007; Ullsperger, Bylsma, & Botvinick,  
155 2005). We refer to the difference in probability cue-based congruency effects as the *conflict*  
156 *expectation effect* (CEE), which is taken here as a measure of *proactive control*. Age should lead to a  
157 reduction in the efficiency of both modes of control (i.e., an increase in CE and a decrease in CEE),  
158 although potentially less so for reactive control (Bugg, 2014). Using a cued-flanker task, we  
159 investigated the relationship between cognitive control processing and resting-state alpha power, theta  
160 power and  $1/f$  slope in a sample of younger and older adults.

## Resting-state EEG and cognitive control

### 161 2. Materials and Methods

#### 162 2.1 Participants

163 Twenty-one younger and 20 older adults were recruited and underwent the procedures  
164 described below<sup>1</sup>. Participants reported no history of psychiatric or neurological disorders and had no  
165 signs of dementia (scores  $\geq 51$  on the modified Mini-Mental Status Examination [mMMSE]; Mayeux,  
166 Stern, Rosen, & Leventhal, 1981), or depression (younger adults assessed with the Beck's Depression  
167 Inventory, Beck, Steer, & Brown, 1996; and older adults with the Geriatric Depression Scale, Yesavage  
168 et al., 1983; Yesavage & Sheikh, 1986). The study received ethical approval from the Institutional  
169 Review Board at the University of Illinois Urbana-Champaign. All participants provided written  
170 informed consent and were compensated for their time.

171 One younger adult and one older adult were excluded for excessive EEG artifacts: eye  
172 movements, muscle activity, and/or amplifier saturation. The remaining 20 younger adults (age range  
173 = 18-30, 14 females) and 19 older adults (age range = 65-80, 11 females) constituted the final sample.  
174 See Table 1 for age-group characteristics. Older and younger adults were well matched in cognitive  
175 status, although older adults, as is typical, had a slight advantage over younger adults in tests relying  
176 on vocabulary knowledge<sup>2</sup>,  $t(35) = 4.29$ ,  $p = .0001$ . Older adults had slightly more years of education,  
177  $t(37) = -2.15$ ,  $p = .04$ , as expected, given that most younger adults were college students. Older adults  
178 also had higher composite age-adjusted IQ,  $t(37) = -2.25$ ,  $p = .03$ , than younger adults.

179 INSERT TABLE 1 ABOUT HERE

---

<sup>1</sup> The sample size reflects predicted effects for this task. To illustrate that the data is suitable for the analysis of individual differences we provide a reliability analysis on the EEG effects reported here.

<sup>2</sup> Two older adults did not take the Shipley Vocabulary Scale, resulting in fewer degrees of freedom for this  $t$ -test.



## 180 2.2 Data Acquisition and Analysis

181 Participants underwent two separate sessions: a resting-state EEG recording session, followed by a  
182 behavioral testing session.

### 183 2.2.1 Resting-State EEG

184 Participants sat in a dimly lit, sound- and electrically attenuated recording chamber, and were  
185 instructed to sit quietly and not think about anything in particular. Each session included a 1-minute  
186 recording of resting EEG with eyes-open followed by 1-minute with eyes-closed. These recording  
187 periods were conducted at the beginning of a recording session that involved other experiments that  
188 will not be reported here.

### 189 2.2.2 EEG Recording and Analysis

190 EEG and EOG were recorded continuously from 64 active electrodes in an elastic cap (Acti-  
191 Cap) using BrainAmp amplifiers (BrainVision Products GmbH). EEG was recorded from scalp  
192 electrodes referenced to the left mastoid, with off-line re-referencing to the average of the two  
193 mastoids. Two electrodes placed above and below the left eye measured vertical EOG to detect blinks  
194 and vertical eye movements. Two electrodes placed approximately 1 cm to the left and right of the  
195 outer canthi of the eyes measured horizontal eye-movements (saccades). Impedance was kept below  
196 10k $\Omega$ . The EEG was filtered on-line using a 0.1-250 Hz bandpass and sampled at 500Hz.

197 Off-line EEG processing was done using EEGLAB Toolbox (version: 13.6.5b; Delorme &  
198 Makeig, 2004), ERPLAB Toolbox (version: 6.1.3) and custom Matlab16a scripts (The MathWorks,  
199 Inc., Natick, Ma, USA). A 30 Hz low-pass filter was applied. The data were epoched into 4096 ms  
200 contiguous segments to facilitate usage of our artifact detection scripts. Epochs with amplifier  
201 saturation were discarded. Ocular artifacts were corrected using the procedure described in Gratton et  
202 al. (1983). After eye movement correction, epochs with voltage fluctuations exceeding 200 $\mu$ V were

## Resting-state EEG and cognitive control

203 excluded from further analysis to minimize the influence of any remaining artifactual activity. This  
204 resulted in the exclusion of 1.26% of the epochs.

205 Power spectral densities were determined using a fast Fourier transform with Welch's method  
206 at parietal (Pz, POz, P1, P2, PO3, PO4) and frontocentral (Fz, FCz, Cz, CPz, FC1, FC2, C1, and C2)  
207 electrode clusters. The segments were zero-padded and multiplied with a Hamming taper, with 0%  
208 overlap. These clusters were selected because alpha power is largest at parietal locations (e.g., Haegens,  
209 Cousijn, Wallis, Harrison, & Nobre, 2014), and  $1/f$  slope and theta are typically largest at frontocentral  
210 locations (Pertermann, Mückschel, Adelhöfer, Ziemssen, & Beste, 2019). This was confirmed in our  
211 sample by a review of topographical plots.

212 For the purposes of the current study, we modeled the observed power spectrum as formed by  
213 the sum of non-oscillatory activity ( $1/f$ ), alpha and theta oscillatory peaks, and noise using the following  
214 equation. Because there was no observable peak in the beta band, beta was not included in the model:

$$215 \quad Power(f) = 1/f \text{ effect}(f) + \theta \text{ power}(f) + \alpha \text{ power}(f) + \epsilon$$

216 where  $f$  is frequency and  $\epsilon$  is noise.

217 To ensure that our measures of alpha and theta oscillatory power were not confounded with  
218 non-oscillatory activity, the  $1/f$  component was removed from the spectrum prior to calculating mean  
219 narrowband power. We first modeled the  $1/f$  component on the raw power spectrum, excluding 4-13  
220 Hz, which represents most oscillatory power in the spectrum, using a least-squares linear regression  
221 with  $1/f$  predicting power (see **Figure 1**; frequencies up to the Nyquist frequencies were used to model  
222  $1/f$ , frequencies up to 30 Hz were plotted). The slope of the  $1/f$  component – i.e., the  $\beta$  weight of  
223 predictor  $1/f$  in the equation – was retained for analysis. Note that the exponent of the  $f$  predictor was  
224 fixed at -1 (i.e.,  $f^{-1}$ ). In other words, we did not use a log-log transform to fit the exponent of the  $1/f$   
225 function to the data, as done in other studies (e.g., Voytek et al., 2015). Rather, we transformed the

226 frequency values into their inverse, and then regressed the power values for each frequency onto this  
227 new axis (excluding power values between 4 and 13 Hz). This procedure was used because it is less  
228 sensitive to very small variations in power for high frequencies, which in the EEG spectrum (compared  
229 to the ECoG spectrum) have very low power. Because of these procedures, the interpretation of the  
230  $1/f$  slope as computed in this fashion is different than that used by Voytek and colleagues (2015).  
231 Rather than reflecting the shape (i.e., the exponent) of the  $1/f$  function, the slope of the  $1/f$  function in  
232 the current study is related to *power at very low frequencies* – and thus corresponds more closely to  
233 the *intercept* of the  $1/f$  function in log-log space as reported by Voytek and coll. (2015).

234 The  $1/f$  trend was then subtracted from the spectrum, allowing for more reliable alpha and theta  
235 estimates (Nikulin & Brismar, 2006; Haegens et al., 2014). Mean alpha and theta power were  
236 quantified on the detrended spectra and then log-transformed. The log transformed data were used for  
237 analysis because power has a positively skewed distribution. Using the logarithm attenuates the  
238 skewness of the power distributions and allows for an ANOVA to be performed without violating the  
239 assumption of normality. Similarly, the  $1/f$  slope was also log-transformed.

240 INSERT FIGURE 1 ABOUT HERE

241 Assessment of alpha power scalp topographies separately at 8, 9, 10, 11, and 12 Hz revealed  
242 low power across the scalp at 8 Hz and 12 Hz in both younger and older adults. Thus, we estimated  
243 alpha power based on the average power between 9-11 Hz. For theta, which did not show a prominent  
244 peak in the spectra, we used a broader frequency window encompassing the full, canonical theta band,  
245 4-8 Hz.

### 246 2.2.3 Behavioral Task Session, Stimuli, and Related Analyses

247 At the beginning of testing, participants were seated 100 cm in front of a computer monitor  
248 centered at eye-level and were read instructions by the experimenter to supplement on-screen

## Resting-state EEG and cognitive control

249 instructions. The imperative stimulus consisted of five horizontal arrows that were either congruent  
250 (<<<<<< or >>>>>>) or incongruent (<<<><< or >><>>>) on any given trial. Participants indicated, as  
251 quickly and accurately as possible, which direction (left or right) the central, target stimulus was  
252 pointing by pressing one of two keypads located on either side of the participant. Stimulus-response  
253 mapping was constant across all participants (i.e., a left-pointing target stimulus always required a left-  
254 button press, and vice versa) to eliminate the possibility of a confounding Simon effect in some  
255 participants (Simon, 1969).

256 Three neutral, low-arousing images of inanimate objects (fire hydrant, dresser, and screw, from  
257 the International Affective Picture System database, IAPS; Lang, Bradley, & Cuthbert, 2008) served  
258 as cues and preceded the imperative stimulus array. These images represented a 75% (predict-  
259 congruent; PC), a 50% (predict-neutral; PN), and a 25% (predict-incongruent; PI) probability of a  
260 congruent stimulus array, respectively. The three cue types were equiprobable and participants were  
261 explicitly told the congruency probability represented by each cue prior to commencing the task. PC  
262 and PI cue images were counterbalanced across subjects.

263 Each trial began with a 499 ms cue, followed by a 999 ms fixation. Then, the imperative  
264 stimulus appeared for 149 ms and was followed by 1848 ms of fixation before the onset of the next  
265 trial. The response window began with the onset of the imperative stimulus and continued until the  
266 onset of the next cue (i.e., the next trial). The global probability of a congruent trial within each block  
267 was 50%. The imperative stimulus arrays were presented in white typeface on a black computer screen  
268 and subtended  $2.23^\circ \times 0.46^\circ$ . Each cue overlaid a gray background with uniform dimensions such that  
269 each composite image subtended  $6.98^\circ \times 5.35^\circ$ . All stimuli were presented on a monitor (19-in. CRT,  
270 refresh rate 60 Hz, screen resolution  $1280 \times 960$ ; Dell Computer, Round Rock TX) using the E-Prime  
271 2.0 software (Psychology Software Tools, Pittsburgh, PA).

272 Accuracy feedback was displayed on-screen at the end of each block. If accuracy was below  
273 75% across all trial types, participants saw a message that read “respond more slowly and more  
274 accurately.” If they scored between 75 and 95%, they saw “continue to respond as quickly and  
275 accurately as you can.” If they scored above 95%, they saw “respond more quickly”. The feedback  
276 was designed to encourage participants to prioritize speeded responses and elicit a reasonable number  
277 of errors, a requirement for accurately assessing speed of processing. Participants could take breaks  
278 between blocks, as needed.

279 Before the flanker task, younger adults completed 96 practice trials at the experimental speed.  
280 Older adults completed two sets of practice trials. Additional practice was added for older adults to  
281 offset difficulties (apparent in preliminary data) for them to complete the task at the experimental  
282 speed. As such, we added a slower-paced practice block to familiarize this group with the task. In the  
283 first set (48 trials), the inter-stimulus interval (ISI) was increased by 30%, but the cue and imperative  
284 stimulus presentation times remained at experimental speed. In the second set (96 trials), each trial ran  
285 at the experimental speed. Subsequently, all participants completed three blocks of 288 experimental  
286 trials.

287 Incorrect trials and all trials with reaction times  $\leq 200$  ms (i.e., fast guesses) were discarded  
288 before statistical analysis. Data were collapsed across target stimulus direction (i.e., response hand) to  
289 create six trial-types: 3 cue types (PC, PI, PN)  $\times$  2 flanker congruency conditions (congruent,  
290 incongruent). In addition to recording reaction time (RT) and calculating error rates for each trial-type,  
291 the inverse efficiency score (IES), an integrated measure of RT and accuracy, was also calculated  
292 (Townsend & Ashby, 1978, 1983; Bruyer & Brysbaert, 2011). IES is insensitive to speed-accuracy  
293 tradeoffs and results in a measure of RT that is not biased by fast decisions. IES is computed by dividing  
294 the mean RT of correct responses by the proportion of correct responses for each trial type (IES =

## Resting-state EEG and cognitive control

295 RT/proportion correct), thereby providing an index of processing speed that estimates the “true”  
296 processing speed when the effects of speed-accuracy tradeoffs are minimized.

297 For our measure of reactive control, we calculated the congruency effect (CE) by subtracting  
298 congruent trials from incongruent trials (Incongruent - Congruent), so smaller differences in RT, error  
299 rate, and IES indicate greater reactive control. For the measure of proactive control, we calculated the  
300 conflict expectation effect (CEE) by subtracting the predict incongruent CE from the predict congruent  
301 CE ( $PC_{CE} - PI_{CE}$ ). Here, a larger difference indicates greater proactive control.

### 302 *2.4 Statistical Analyses*

303 Two-way mixed ANOVAs were computed, with age (young, old) as a between-subjects factor,  
304 eye status (open, closed) as a repeated measure, and alpha power, theta power, or  $1/f$  slope as dependent  
305 variables. Alpha analyses were restricted to the parietal cluster, whereas theta and  $1/f$  analyses were  
306 restricted to the frontal cluster. Spearman’s *rank-order* correlation coefficients were computed between  
307 alpha power, theta power,  $1/f$  slope and behavioral performance measurements (CE and CEE for error  
308 rate, RT, and IES) across participants, in order to assess the effects of individual variability in resting-  
309 state EEG parameters and subsequent cognitive control processing. Spearman’s rho was used instead  
310 of Pearson’s *r* because assessment of normality with the Shapiro-Wilk test indicated that the behavioral  
311 measures were not normally distributed. These correlations were calculated both with and without  
312 partialing out the effects of age. The CEs were assessed with age (young, old), cue-type (PC, PI, PN),  
313 and trial-type (congruent, incongruent) in three-way mixed ANOVAs. The CEE was assessed by  
314 comparing the predict-incompatible to the predict-compatible dependent variables (error rate, RT, and  
315 IES) in a 2 x 2 ANOVA with age as the between-subjects factor. To address the non-normality,  
316 behavioral data were log-transformed prior to computing the ANOVAs. Significance levels were  
317 corrected for multiple comparisons as noted in the results.

318           Given the relatively small sample size, we computed intrasubject reliability for alpha and theta  
319 power and  $1/f$  slope across the recording period, to show the consistency of the measurements. This  
320 was done by comparing alpha power and theta power (after removing the  $1/f$  effect) and  $1/f$  slope  
321 during even and odd epochs (each 4096 ms in length). Spearman's rho was calculated between these  
322 values for even and odd epochs for each participant.

### 323 **3. Results**

#### 324 *3.1 EEG Power Spectrum Decomposition*

325           After decomposing the power spectrum into alpha power, theta power and  $1/f$  slope we  
326 quantified the variance in the power spectrum captured by these components across participants. To  
327 do this, we partitioned each individual's power spectrum into four components: the power accounted  
328 for using the  $1/f$  slope, alpha power, theta power, and the remaining, residual power not captured by  
329 the model. Together, these should capture 100% of the variance in the power spectrum, given that  
330 power itself is a measure of variance of the EEG time-series. Taking the sum of power accounted for  
331 with  $1/f$  slope, alpha, and theta and dividing it by the sum of all four components will yield the amount  
332 of variability in the power spectrum accounted for by the non-oscillatory and main oscillatory features  
333 of the EEG power spectrum. This was done for each participant and then averaged across participants  
334 to give an overall estimate of captured variance. With eyes open, these three parameters (alpha power,  
335 theta power, and  $1/f$  slope) accounted for 90% of the spectral variance at the parietal electrode cluster  
336 and 93% at the frontocentral cluster. Alpha, theta, and  $1/f$  slope accounted for slightly less variance  
337 with eyes closed: 89% at both the parietal and frontocentral electrode clusters. Therefore, although the  
338 EEG signal is rich and complex, it can be largely described by these parameters. Power spectra (after  
339 removing  $1/f$  slope) for each electrode cluster are shown in Figure 2.

340           Alpha, theta and  $1/f$  scalp distributions are presented in Figure 3. As shown in these maps,  
341 younger and older adults had a posterior alpha scalp distribution, and a more anterior theta, as typically

## Resting-state EEG and cognitive control

342 observed. The scalp distribution of  $1/f$  had both anterior and posterior aspects. All effects were larger  
343 around the midline.

344 INSERT FIGURES 2-3 ABOUT HERE

345 Alpha power at the parietal cluster was positively correlated with theta power at the  
346 frontocentral cluster with eyes open,  $r(37) = .344, p = .032$ , [ $r(36) = .345, p = .034$  after partialing out  
347 age], and with eyes closed,  $r(37) = .423, p = .007$ , [ $r(36) = .386, p = .017$  after partialing out age].  
348 Thus, theta and alpha power were correlated with each other at rest, both before and after accounting  
349 for age effects and in both eye conditions.

350 Neither alpha nor theta power were correlated with  $1/f$  slope [alpha, eyes open,  $r(37) = .087, p$   
351  $= .600$  or eyes closed,  $r(37) = .172, p = .295$ ; theta, eyes open,  $r(37) = .185, p = .260$ , or eyes closed,  
352  $r(37) = .132, p = .423$ ]. All of these correlations remained non-significant after partialing out age.

### 353 *3.2 Reliability Analyses Within Individuals*

354 To show the consistency of the measurements, we computed intrasubject reliability for alpha  
355 and theta power and  $1/f$  slope across the recording period, by comparing even and odd epochs (each  
356 4096ms in length).<sup>3</sup> We found that alpha power was highly consistent within individuals both with  
357 open ( $r_s(37) = .922, p < .00001$ , average rho across participants) and closed eyes ( $r_s(37) = .980, p <$   
358  $.00001$ , average rho across participants). Similarly, theta power was highly reliable both with open ( $r_s$   
359  $(37) = .774, p < .00001$ ) and closed eyes ( $r_s(37) = .816, p < .00001$ ). Lastly,  $1/f$  slope was also consistent  
360 within individuals with open ( $r_s(37) = .931, p < .00001$ ) and closed eyes ( $r_s(37) = .854, p < .00001$ ).

---

<sup>3</sup> To ensure that the correlations between even-odd epochs were not an effect of temporal continuity between power or  $1/f$  in these epochs and to clarify whether power or  $1/f$  changed as a result of participant fatigue, we also computed these correlations between the first and second half of the recording periods. They were all highly correlated: alpha power  $r_s = .909$ , theta power,  $r_s = .963$ ;  $1/f$  slope  $r_s = .910$ . These correspond well to the even-odd reliability analysis reported in the results section.



361 3.3 Effects of age and eye status on alpha, theta, and 1/f

362 A 2(age) × 2(eye status) mixed effects ANOVA was run for alpha power at the parietal  
363 electrode clusters. As expected, alpha power was greater with closed compared to open eyes,  $F(1, 37)$   
364 = 24.865,  $p < .001$ , partial  $\eta^2 = .402$  (see Figures 2-3). Although there was no main effect of age  $F(1,$   
365 37) = 1.056,  $p = .311$ , partial  $\eta^2 = .208$ , there was an age by eye status interaction,  $F(1, 37) = 10.260,$   
366  $p = .003$ , partial  $\eta^2 = .217$ . Assessing the simple effects with eyes open, there was little difference in  
367 alpha power between younger and older adults,  $F(1, 37) = .255$ ,  $p = .616$ , partial  $\eta^2 = .007$  but when  
368 they closed their eyes, younger adults had significantly higher alpha power than older adults,  $F(1, 37)$   
369 = 11.225,  $p = .002$ , partial  $\eta^2 = .233$ . This may indicate that older adults modulate their resting-state  
370 alpha power less than younger adults, which, in turn, may reflect a weakening of the neural system  
371 giving rise to the alpha rhythm, or of the mechanisms for controlling it.

372 A similar analysis was run for theta power measured at the frontocentral cluster. The results  
373 indicated a main effect of eye status,  $F(1,37) = 25.438$ ,  $p < .001$ , partial  $\eta^2 = .407$  with greater power  
374 with closed than open eyes. However, there was no significant difference between the two age groups,  
375  $F(1,37) = 0.064$ ,  $p = .801$ , partial  $\eta^2 = .002$ , and the interaction between age and eye condition was not  
376 significant,  $F(1,37) = 2.850$ ,  $p = .100$ , partial  $\eta^2 = .072$ . Thus, the data suggest no effect of age on theta  
377 power at rest.

378 The 1/f slope was analyzed with a 2(age) × 2(eye status) mixed ANOVA at the frontocentral  
379 cluster to determine potential group differences and the effect of eye condition on 1/f slope. The  
380 ANOVA revealed that 1/f slope was greater with closed than open eyes,  $F(1, 37) = 8.223$ ,  $p = .007$ ,  
381 partial  $\eta^2 = .182$ . There was also a main effect of age,  $F(1, 37) = 12.363$ ,  $p = .001$ , partial  $\eta^2 = .250$ ,  
382 such that younger adults had higher levels of 1/f activity than older adults and this effect did not interact  
383 with eye status,  $F(1, 37) = .173$ ,  $p = .680$ . An age-related reduction in 1/f slope had been previously  
384 shown during visual working memory tasks (Voytek et al., 2015; note however, that in their study this

## Resting-state EEG and cognitive control

385 was labeled  $1/f$  intercept, see Methods section) and language processing tasks (Dave et al., 2018), but  
386 to our knowledge this is the first time this age-related reduction has been demonstrated at the scalp in  
387 the absence of an explicit cognitive task.

388 We performed some additional ancillary analyses, reported in **Supplementary Materials**, to  
389 establish whether the timing patterns of theta and alpha occurrence at rest are similar to those observed  
390 during tasks. Specifically, we sought to investigate whether frontocentral theta *at rest* occurs in short  
391 bursts, as it typically does in tasks in response to the onset of attention-catching stimuli (Cavanagh &  
392 Frank, 2014; Cohen & Donner, 2013). Task-recorded alpha, instead, is often present before stimulus  
393 onset, with theta bursts typically occurring simultaneously with the alpha suppression that follows  
394 stimuli that capture attention. Thus, we predicted alpha to be present in a higher proportion of the time  
395 during the resting-state recording than theta. The results of these supplementary analyses are overall  
396 consistent with these hypotheses, supporting the idea that similar temporal patterns characterize the  
397 resting-state spectrum for theta and alpha compared to their task-based counterparts.

### 398 3.4. Behavioral Effects

399 Evidence from behavioral ANOVAs replicated the well-established CE for error rate [ $F(1, 37)$   
400 = 24.708,  $p < .001$ , partial  $\eta^2 = .381$ ], RT [ $F(1, 37) = 272.342$ ,  $p < .001$ , partial  $\eta^2 = .88$ ], and IES [ $F(1,$   
401  $37) = 147.599$ ,  $p < .001$ , partial  $\eta^2 = .800$ ]. There was a main effect of age on the CE when measured  
402 with RT,  $F(1, 37) = 22.514$ ,  $p < .001$ , partial  $\eta^2 = .378$  and IES  $F(1, 37) = 22.797$ ,  $p < .001$ , partial  $\eta^2$   
403 = .381 such that older adults had a larger CE than younger adults.

404 The probability cues also influenced the size of the CE. This was reflected in a CEE for RT  
405 [ $F(1, 37) = 6.042$ ,  $p = .035$ , partial  $\eta^2 = .140$ ] and IES [ $F(1, 37) = 5.070$ ,  $p = .047$ , partial  $\eta^2 = .121$ ],  
406 where CE's were larger following predict congruent compared to predict incongruent trials. The CEE  
407 was not apparent for error rate,  $F(1, 37) = 2.412$ ,  $p = .177$ , partial  $\eta^2 = .061$  and there was no age by

408 CEE interaction for any of the 3 behavioral measures: error rate [ $F(1, 37) < 0.001, p > .999$ , partial  
409  $\eta^2 = 0.0$ ], RT [ $F(1, 37) = 1.853, p = .222$ , partial  $\eta^2 = .048$ ] or IES [ $F(1, 37) = 0.001, p > .999$ , partial  
410  $\eta^2 = 0.0$ ]. All reported  $p$ -values for the predicted main effects in this section were corrected for multiple  
411 comparisons using FDR.

### 412 *3.5 Correlations between Cognitive Control and Resting-State Alpha Power, Theta Power and 1/f* 413 *Slope*

414 Critically, the current study explored the relationship between alpha power, theta power and  
415  $1/f$  slope and proactive and reactive cognitive control processes. The results reported here are  
416 exclusively for the eyes open condition, as the eyes closed condition did not predict behavior (it should  
417 be noted that this is not surprising, as the behavioral measures were obtained with the eyes-open). All  
418 correlations were corrected for multiple comparisons using family-wise FDR to control the expected  
419 proportion of false positives in our results. As shown in Figure 4A, alpha power predicted the size of  
420 the CEE for IES,  $r_s(37) = .491, p = .024$ . This is consistent with the prediction that alpha is related to  
421 individual differences in proactive control. Alpha predicted RT CEE prior to multiple comparisons  
422 correction,  $r_s(37) = .321, p = .046$ , but not after:  $p = .183$ . The relationship between IES CEE and alpha  
423 remained significant even after partialing out the effects of age, IES CEE:  $r_s(36) = .487, p = .024$ ,  
424 suggesting that the ability to engage proactive control is not driven by age per se, and may instead  
425 reflect individual differences in proactive cognitive control capacity that may be maintained in healthy  
426 aging. In contrast, alpha power did not predict the size of the IES CE,  $r_s(37) = .118, p = .630$  (with or  
427 without partialing out the effects of age). Thus, alpha power appears specifically related to proactive  
428 control abilities rather than to cognitive control in general, with greater proactive control in individuals  
429 with larger alpha power at rest.

430 For resting theta power, there was a marginal positive relationship with the error rate CE,  $r_s$   
431  $(37) = .406, p = .06$ , which varied little when age was partialled out,  $r(36) = .410, p = .06$ . This effect

## Resting-state EEG and cognitive control

432 was not present for RT CE,  $r_s(37) = .020$ ,  $p = .902$  or with IES CE,  $r_s(37) = .306$ ,  $p = .183$ . Theta  
433 power was not significantly correlated with the CEE for any of the behavioral measures: error rate,  $r_s$   
434  $(37) = .226$ ,  $p = .332$ , RT  $r_s(37) = -.040$ ,  $p = .883$ , or IES,  $r_s(37) = .182$ ,  $p = .434$ , and remained non-  
435 significant after partialing out age. These results indicate a modest relationship between theta activity  
436 at rest and reactive, but not proactive, control. Interestingly, the data indicate that individuals with  
437 high theta power at rest are more affected by distractors than individuals with low theta power. These  
438 data are shown in Figure 4B.

439 It is important to investigate the dissociation between both alpha and theta power and their  
440 relationships to proactive and reactive control, respectively. Therefore, partial correlation analyses  
441 were conducted to further illustrate the effect of alpha power on proactive control processes while  
442 holding theta power constant and the effect of theta power on reactive control processes while holding  
443 alpha power constant. As throughout this section, these analyses were conducted on the eyes-open  
444 measurements and corrected for multiple comparisons using family-wise FDR. Alpha power was  
445 positively related to the IES CEE [ $r_s(36) = .464$ ,  $p = .018$ ] and the RT CEE [ $r_s(36) = .368$ ,  $p = .046$ ]  
446 after partialing out the effects of theta power. As before, the error rate CEE was not related to alpha  
447 power, even after partialing out theta power [ $r_s(36) = .198$ ,  $p = .281$ ]. The relationship between theta  
448 power and reactive control processes also varied little after partialing out the effects of alpha power.  
449 As before, there was a positive relationship between theta power and the error rate CE [ $r_s(36) = .402$ ,  
450  $p = .036$ ]. Taken together, these results indicate that alpha power is indeed related to proactive control  
451 processes, in a way that is independent from the contributions of theta power, and, conversely, that  
452 theta power may be related to reactive control processes, in a way that is independent from the  
453 contributions of alpha (although this result is only marginally significant). This suggests that alpha and  
454 theta power *at rest* are uniquely related to proactive and reactive control, respectively. As such, they  
455 could be used as separable biomarkers for these two aspects of cognitive control.

456

INSERT FIGURE 4 ABOUT HERE

457 Exploratory analyses of  $1/f$  slope indicated that it marginally predicted the error rate CEE,  $r_s$   
458  $(37) = .271, p = .096$ , an effect which reached significance after controlling for age,  $r_s(36) = .368, p =$   
459  $.023$ . This may indicate that higher levels of  $1/f$  activity is predictive of greater proactive control (Figure  
460 4C). Additionally,  $1/f$  slope was not related to the error rate CE before,  $r_s(37) = .233, p = .153$ , or after  
461 partialing out age,  $r_s(36) = .119, p = .477$ . This suggests that  $1/f$  slope may be more related to proactive  
462 rather than reactive control processes. It should be noted, however, that there was no clear *a priori*  
463 prediction for the  $1/f$  slope, and that the effects reported were not corrected for multiple comparisons.  
464 Therefore, these findings require additional replications.

#### 465 **4. Discussion**

466 Most (~90%) of the resting-state EEG power spectrum can be described by three parameters:  
467 the amplitude of the oscillatory spectral activity in the alpha and theta bands and the slope of the non-  
468 oscillatory  $1/f$  component. These three spectral features were larger with closed than open eyes.  
469 Interestingly, two of these features differed between younger and older adults, such that older adults  
470 had less alpha power (at least with closed eyes) and less  $1/f$  activity (i.e., less power at lower  
471 frequencies) than younger adults. Both of these findings are consistent with previous reports (Babiloni  
472 et al., 2006; Dave et al., 2018; Polich, 1997; Voytek et al., 2015). No age differences were found for  
473 theta activity, similarly to some previously reported research (Babiloni et al., 2006; Finely, Angus, van  
474 Reekum, Davidson & Schaefer, 2020). Consistent with our hypotheses, these electrophysiological  
475 characteristics were related to different aspects of cognitive control processing: increased alpha power  
476 (and, to a lesser extent,  $1/f$  slope) predicted greater modulation of distractor processing given the cue  
477 information (conflict expectation effects), whereas theta power predicted greater distractor interference  
478 in error rates only (congruency effects). Following the dual mechanism framework proposed by Braver  
479 (2012), our evidence suggests that resting alpha power (and perhaps  $1/f$  slope) are related to individual

## Resting-state EEG and cognitive control

480 differences in proactive control processes, whereas theta power reflects individuals' variations in  
481 reactive control. A compelling picture emerges from these data: separate parameters from the  
482 decomposed EEG power spectrum *at rest* may predict separable cognitive control processes during a  
483 behavioral task, independent of participant's age. The alpha results resonate with previous work, which  
484 showed that alpha power predicted subsequent learning in a complex video game task involving  
485 multiple aspects of cognition (Mathewson et al., 2012).

486 Resting-state EEG has been previously used to investigate individual variability in cognitive  
487 status and cognitive performance, especially in the context of aging and cognitive decline. Most often,  
488 these recordings are conducted with eyes closed and have illustrated a shift in the EEG power spectrum  
489 as participants progress from a healthy cognitive status to MCI and AD (Babiloni et al., 2006; Kwak,  
490 2006). This suggests that, as older adults change in cognitive status, their closed-eyes resting-state EEG  
491 spectrum changes concurrently, and that these changes can be used as indices of cognitive performance.

492 In the current study the predictability of the power spectrum characteristics on cognitive control  
493 processes occurred in the eyes open condition and in *both* younger and older adults, which suggests  
494 that this informative neural variability exists already in younger adults and may continue to provide  
495 predictive power as individuals age. This is not equivalent to saying that age has no effect on either  
496 alpha/theta amplitude or proactive/reactive control. Rather, it indicates that *mechanistic relationships*  
497 between the neural systems represented by alpha and theta and cognitive control functions may be  
498 maintained throughout the healthy lifespan, even though the individual component functions of these  
499 relationships may weaken (see Fabiani, 2012). As an example, in a study of the relationship between  
500 sequential effects in P300 amplitude and working memory function, we showed that the *relationship*  
501 was the same for younger and older adults, despite an evident reduction in working memory capacity  
502 and a shortening of the sequential activity in aging (Peltz, Gratton, & Fabiani, 2011).

503 As noted, there is an apparent dissociation between the typical age-related resting-state alpha  
504 differences observed with closed eyes, and the predictive role of alpha measures taken with open eyes,  
505 which is irrespective of age. This may indicate that individual differences in resting-state open-eyes  
506 alpha may better predict cognitive control phenomena occurring in tasks where visual attention is  
507 required, and eyes are open. It remains to be shown whether age-related differences in alpha obtained  
508 with closed eyes are instead more likely to be predictive of cognitive phenomena that do not rely on  
509 visual attention and can occur when the eyes are closed. This should be investigated in future research.

510 In many previous studies, alpha power fluctuations were investigated during ongoing cognitive  
511 control tasks using a time-frequency approach. These experiments often report alpha blocking during  
512 working memory encoding, attentional engagement, and proactive inhibition (Sauseng et al., 2005;  
513 Foxe & Snyder, 2011; Vissers et al., 2016; Wöstmann et al., 2019). They also report phasic posterior  
514 alpha power reductions following error trials (i.e., Cooper et al., 2016; van Driel, Ridderinkhof, &  
515 Cohen, 2012). These decreases in alpha power have been conceptualized as a mechanism associated  
516 with the refocusing of attention after an error occurred and when the updating of ongoing working  
517 memory task-related representations is needed. Gratton (2018; see also Mathewson et al., 2009; 2011)  
518 proposed that a temporary *blocking* of alpha is required for, or at least facilitates, the updating of  
519 representations. This is consistent with the idea that alpha per se is associated with the maintenance of  
520 existing representations over time (a phenomenon that would resist the updating process). This  
521 proposal links alpha mechanisms with the maintenance of representations, which would be required  
522 during proactive but not reactive control. This is consistent with the findings of the current study, in  
523 which alpha power at rest was predictive of the size of the conflict expectation effect (which requires  
524 maintenance of task-related representations in the interval between cues and response stimuli) but not  
525 of the congruency effect (which requires direct handling of conflict, without a delay).

## Resting-state EEG and cognitive control

526           According to Gratton (2018), bursts of frontocentral theta may provide a mechanism by which  
527 alpha is temporarily suspended to facilitate the updating of representations. As such, theta bursts would  
528 provide an opportunity for sustained alpha oscillations to be interrupted and for the maintenance of a  
529 representation to either be changed in favor of a new task-relevant representation, or in favor of a task-  
530 irrelevant distractor. Ancillary analyses, reported as **Supplementary Materials**, investigated whether  
531 theta occurs in a more burst-like manner than alpha (*at rest* and after accounting for  $1/f$  activity). The  
532 results showed that this was indeed the case in the eyes open condition. These exploratory analyses  
533 suggest that, even during resting-state and in the absence of discernible external triggering events, theta  
534 tends to occur in shorter bursts than alpha. Further, the data suggest that the frequency of occurrence  
535 of theta bursts is strongly reflected by the total power across the whole resting-state recording period,  
536 whereas this is much less so for alpha. With respect to the functional significance of these bursts, we  
537 argue that, although a flexible engagement of theta interruption mechanisms is a useful process, integral  
538 to cognitive control, its excessive engagement may lead to maladaptive responses (i.e., distractibility)  
539 in conditions in which refocusing is not needed. This effect may be evident during resting-state  
540 situations: In such conditions, engagement of theta activity and blocking of alpha activity are not  
541 required, and the trait-like propensity to do so may be correlated with lower control abilities during  
542 tasks. It may also explain previously reported results, which indicate that IQ is negatively correlated  
543 with resting-state theta, and positively correlated with resting-state alpha (Doppelmayr et al., 2002;  
544 Jaušovec et al., 2001). Our results also inform the trait-like spectral differences in adults with ADHD,  
545 which indicate both increased theta power and decreased alpha power (Woltering, Jung, Liu, &  
546 Tannock, 2012), and could explain the tendency for increased distractibility in these individuals. This  
547 pattern may develop with the disorder, as Robertson et al. (2019) have shown that unmedicated children  
548 with ADHD have similar theta power but more alpha power compared to typically developing children.



549 In the present study, such a propensity may be associated with increased susceptibility to the  
550 interference caused by incompatible flankers in the flanker task.

551 As mentioned previously, the evidence for age-related decreases in theta power is mixed  
552 (Babiloni et al., 2006; Cummins & Finnigan, 2007; Finely Angus, van Reekum, Davidson & Schaefer,  
553 2020). Prichep et al. (2006) reported reductions in resting-state theta power in cognitively typical older  
554 individuals with subjective memory complaints seven years later, but only for those individuals whose  
555 mental status declined during the seven-year interval. This may address why younger and older adults  
556 in our study did not show theta power differences. Our older adults were cognitively intact and not  
557 reporting memory complaints. Finnigan and Robertson (2011) reported that relatively higher resting  
558 theta power in healthy older adults was related to better performance on verbal recall, attention, and  
559 executive function measures. Taken together these results suggest that the relationship between  
560 resting-state theta activity and cognitive abilities is complex, and perhaps not monotonic. Perhaps some  
561 minimum level of theta function needs to be maintained for appropriate cognition, but an excessive  
562 amount may signal a propensity to over-react to contextual changes and distraction, which may also be  
563 deleterious for cognition (e.g., Cools & D'Esposito, 2011). Further studies are needed to investigate  
564 this hypothesized inverse-U relationship between theta function at rest and cognition.

565 Although we did not find a difference in theta power with age, we did find a reduced  $1/f$  slope  
566 with age, replicating similar age effects reported by Voytek et al. (2015) and Dave et al. (2018). It is  
567 important to note that, as computed in our study,  $1/f$  slope is largely determined by low-frequency EEG  
568 activity (in a manner more similar to the intercept measures reported by Voytek et al., 2015). Thus,  
569 the reduction in  $1/f$  slope observed in the current study fits well with other literature reporting reduced  
570 delta power across the adult lifespan (Babiloni et al., 2006; Polich, 1997). Interestingly, in both of  
571 these studies, alpha power was also shown to decrease with age, which we have reported as well. Here  
572 we show, for the first time, a relationship between  $1/f$  slope and proactive control processes. This is of

## Resting-state EEG and cognitive control

573 interest because it suggests that an additional electrophysiological mechanism may be involved in  
574 control processing. We have shown that alpha power and  $1/f$  slope are not correlated with each other  
575 (in the open eyes condition), indicating that although they both predict proactive control processing,  
576 they are likely to be distinct electrophysiological signals. Since the analyses of  $1/f$  were largely  
577 exploratory, they should be replicated and extended in future research.

578         Some limitations of the current study should be pointed out. First, our study is limited by its  
579 sample size. Nonetheless, predictive relationships were still present in this sample, suggesting that  
580 their effect size is sufficient. It is clear, however, that further testing with larger samples and other  
581 cognitive control tasks may be very useful to further validate the results reported here. Additionally,  
582 time-frequency analyses of EEG recorded during rest with different levels of alertness, and compared  
583 to diverse cognitive control tasks in a within-subject design would allow us to investigate the dynamics  
584 of these electrophysiological parameters and assess whether alpha and  $1/f$  slope and theta power  
585 selectively mediate proactive and reactive control. These analyses may also be useful to demonstrate  
586 that EEG parameters measured at rest are predictive of possible trait-like individual differences in  
587 event-related time-frequency phenomena.

### 588 4.1 Conclusions

589         Resting-state EEG contains three dominant – and largely separable – electrophysiological  
590 signals: oscillatory alpha and theta power, and non-oscillatory  $1/f$  slope. We found independent and  
591 separable predictive relationships between *resting-state* alpha power and proactive control, and theta  
592 power and reactive control, which existed regardless of participants' age. The fact that these  
593 dimensions of cognitive control can be predicted from EEG activity *at rest*, and are therefore unrelated  
594 to specific task characteristics, suggests that they may represent important trait-like biomarkers. As

595 such, they may prove useful in understanding life-span individual differences in cognition and may  
596 help researchers investigate variability in cognitive aging.

## Resting-state EEG and cognitive control

### 597 **5. Conflict of Interest**

598 The authors declare that the research was conducted in the absence of any commercial or financial  
599 relationships that could be construed as a potential conflict of interest.

600

### 601 **6. Author Contributions**

602 GMC helped design the study, collected and analyzed the EEG data, and wrote the first draft of the  
603 manuscript; DCB collected and analyzed the behavioral data; MG helped with the EEG analysis  
604 pipeline and execution; KAL helped with experimental design and analyses; MF and GG designed  
605 the study, and supervised analyses and writing. All authors edited the manuscript and met to discuss  
606 results and theoretical implications.

607

### 608 **7. Funding**

609 This work was supported by NIA grant RF1AG062666 to G. Gratton and M. Fabiani.

610

### 611 **8. Acknowledgments**

612 We acknowledge Brooke Frazier, Dana Joulani, Rebecca Lii, Madeleine Peckus, Preeti Subramanian,  
613 and Yunsu Yu for help with data collection.

614

## 615 9. References

616

- 617 Babiloni, C., Binetti, G., Cassetta, E., Forno, G. D., Percio, C. Del, Ferreri, F., ... Rossini, P. M.  
618 (2006). Sources of cortical rhythms change as a function of cognitive impairment in  
619 pathological aging: A multicenter study. *Clinical Neurophysiology*, *117*(2), 252–268.  
620 <https://doi.org/10.1016/j.clinph.2005.09.019>
- 621 Beck, A., Steer, R., & Brown, G. (1996). Manual for the Beck Depression Inventory-II (BDI-II).
- 622 Braver, T.S. (2012). The variable nature of cognitive control: A dual mechanisms framework. *Trends*  
623 *in Cognitive Science*, *16*, 106–113. <http://doi.org/10.1016/j.tics.2011.12.010>.
- 624 Braver, T.S., & Barch, D.M. (2002). A theory of cognitive control, aging cognition, and  
625 neuromodulation. *Neuroscience Biobehavioral Reviews*, *26*(7):809-17.  
626 [https://doi.org/10.1016/s0149-7634\(02\)00067-2](https://doi.org/10.1016/s0149-7634(02)00067-2).
- 627 Bruyer, R., & Brysbaert, M. (2011). Combing speed and accuracy in cognitive psychology: Is the  
628 Inverse Efficiency Score (IES) a better dependent variable than the mean reaction time (RT) and  
629 the percentage of errors (PE)? *Psychologica Belgica*, *51*(1), 5–13. [https://doi.org/10.5334/pb-51-](https://doi.org/10.5334/pb-51-1-5)  
630 [1-5](https://doi.org/10.5334/pb-51-1-5)
- 631 Bugg, J. M. (2014). Evidence for the sparing of reactive cognitive control with age. *Psychology and*  
632 *Aging*, *29*(1), 115–127. <https://doi.org/10.1037/a0035270>
- 633 Cavanagh, J. F., Cohen, M. X., & Allen, J. J. B. (2009). Prelude to and resolution of an error: EEG  
634 phase synchrony reveals cognitive control dynamics during action monitoring. *Journal of*  
635 *Neuroscience*, *29*(1), 98–105. <https://doi.org/10.1523/JNEUROSCI.4137-08.2009>
- 636 Cavanagh, J. F., & Frank, M. J. (2014). Frontal theta as a mechanism for cognitive control. *Trends in*  
637 *Cognitive Sciences*. Elsevier Ltd. <https://doi.org/10.1016/j.tics.2014.04.012>
- 638 Clayton, M. S., Yeung, N., & Kadosh, R. C. (2015). The roles of cortical oscillations in sustained  
639 attention. *Trends in Cognitive Sciences*, *19*(4), 188-195.  
640 <https://doi.org/10.1016/j.tics.2015.02.004>
- 641 Cohen, M. X. (2014). A neural microcircuit for cognitive conflict detection and signaling. *Trends in*  
642 *Neurosciences*, *37*(9), 480-490. <https://doi.org/10.1016/j.tins.2014.06.004>
- 643 Cohen, M. X., & Donner, T. H. (2013). Midfrontal conflict-related theta-band power reflects neural  
644 oscillations that predict behavior. *Journal of Neurophysiology*, *110*(12), 2752-2763.  
645 <https://doi.org/10.1152/jn.00479.2013>
- 646 Cools, R., D'Esposito, M. (2011). Inverted-U-shaped dopamine actions on human working memory  
647 and cognitive control. *Biological Psychiatry*, *69*(12), e113-e125.  
648 <https://doi.org/10.1016/j.biopsych.2011.03.028>
- 649 Cooper, P. S., Darriba, Á., Karayanidis, F., & Barceló, F. (2016). Contextually sensitive power  
650 changes across multiple frequency bands underpin cognitive control. *NeuroImage*, *132*, 499–  
651 511. <https://doi.org/10.1016/j.neuroimage.2016.03.010>
- 652 Cummins, T.D.R., & Finnegan, S. (2007). Theta power is reduced in healthy cognitive aging.  
653 *International Journal of Psychophysiology*, *66*(1), 10-17.

## Resting-state EEG and cognitive control

- 654 <https://doi.org/10.1016/j.ijpsycho.2007.05.008>
- 655 Dave, S., Brothers, T. A., & Swaab, T. Y. (2018). 1/F Neural Noise and Electrophysiological Indices  
656 of Contextual Prediction in Aging. *Brain Research, 1691*, 34–43.  
657 <https://doi.org/10.1016/j.brainres.2018.04.007>
- 658 Delorme, A., & Makeig, S. (2004). EEGLAB: An open source toolbox for analysis of single-trial  
659 EEG dynamics including independent component analysis. *Journal of Neuroscience Methods,*  
660 *134*(1), 9–21. <https://doi.org/10.1016/j.jneumeth.2003.10.009>
- 661 Doppelmayr, M., Klimesch, W., Stadler, W., Pöllhuber, D., & Heine, C. (2002). EEG alpha power  
662 and intelligence. *Intelligence, 30*(3), 289–302. [https://doi.org/10.1016/s0160-2896\(01\)00101-5](https://doi.org/10.1016/s0160-2896(01)00101-5)
- 663 Egner, T. (2007). Congruency sequence effects and cognitive control. *Cognitive, Affective and*  
664 *Behavioral Neuroscience.* <https://doi.org/10.3758/CABN.7.4.380>
- 665 Eriksen, B., & Eriksen, C. W. (1974). *Effects of noise letters upon the identification of a target letter*  
666 *in a nonsearch task\**. *Perception & Psychophysics* (Vol. 16).
- 667 Fabiani, M. (2012). It was the best of times, it was the worst of times: A psychophysiology's view  
668 of cognitive aging. *Psychophysiology 49*:283–304. [https://doi.org/10.1111/j.1469-](https://doi.org/10.1111/j.1469-8986.2011.01331.x)  
669 [8986.2011.01331.x](https://doi.org/10.1111/j.1469-8986.2011.01331.x)
- 670 Finley, A., Angus, D., van Reekum, C., Davidson, R., & Schaefer, S. (2020). Age, theta/beta ratios,  
671 and individual peak alpha frequency in older adults. *Psychophysiology, 57* (S1), S58.
- 672 Finnigan, S., & Robertson, I. H. (2011). Resting EEG theta power correlates with cognitive  
673 performance in healthy older adults. *Psychophysiology, 48*(8), 1083–1087.  
674 <https://doi.org/10.1111/j.1469-8986.2010.01173.x>
- 675 Foxe, J. J., & Snyder, A. C. (2011). The Role of Alpha-Band Brain Oscillations as a Sensory  
676 Suppression Mechanism during Selective Attention. *Frontiers in Psychology, 2*(July), 154.  
677 <https://doi.org/10.3389/fpsyg.2011.00154>
- 678 Gordon, S., Todder, D., Deutsch, I., Garbi, D., Getter, N., & Meiran, N. (2018). Are resting-state  
679 spectral power measures related to executive functions in healthy young adults?  
680 *Neuropsychologia, 108*, 61-72. <https://doi.org/10.1016/j.neuropsychologia.2017.10.031>
- 681 Gratton, G., Coles, M. G. H., & Donchin, E. (1992). Optimizing the use of information: Strategic  
682 control of activation of responses. *Journal of Experimental Psychology: General, 121*(4), 480–  
683 506. <https://doi.org/10.1037/0096-3445.121.4.480>
- 684 Gratton, G., Coles, M. G. H., & Donchin, E. (1983). A new method for off-line removal of ocular  
685 artifact. *Electroencephalography and Clinical Neurophysiology, 55*(4), 468–484.  
686 [https://doi.org/10.1016/0013-4694\(83\)90135-9](https://doi.org/10.1016/0013-4694(83)90135-9)
- 687 Gratton, G., Cooper, P., Fabiani, M., Carter, C. S., & Karayanidis, F. (2017). Dynamics of cognitive  
688 control: Theoretical bases, paradigms, and a view for the future. *Psychophysiology, (June)*, 1–  
689 29. <https://doi.org/10.1111/psyp.13016>
- 690 Gratton, G. (2018). Brain reflections: A circuit-based framework for understanding information

- 691 processing and cognitive control. *Psychophysiology* 55:1–26.  
692 <https://doi.org/10.1111/psyp.13038>
- 693 Haegens, S., Cousijn, H., Wallis, G., Harrison, P. J., & Nobre, A. C. (2014). Inter- and intra-  
694 individual variability in alpha peak frequency. *NeuroImage*, 92, 46–55.  
695 <https://doi.org/10.1016/j.neuroimage.2014.01.049>
- 696 Hanslmayr, S., Gross, J., Klimesch, W., & Shapiro, K. L. (2011). The role of alpha oscillations in  
697 temporal attention. *Brain Research Reviews*, 67(1-2), 331-343.  
698 <https://doi.org/10.1016/j.brainresrev.2011.04.002>
- 699 He, B. J. (2014). Scale-free brain activity: Past, present, and future. *Trends in Cognitive Sciences*,  
700 18(9), 480–487. <https://doi.org/10.1016/j.tics.2014.04.003>
- 701 Jaušovec, N., Jaušovec, K., & Gerlič, I. (2001). Differences in event-related and induced EEG  
702 patterns in the theta and alpha frequency bands related to human emotional intelligence.  
703 *Neuroscience Letters*, 311(2), 93–96. [https://doi.org/10.1016/S0304-3940\(01\)02141-3](https://doi.org/10.1016/S0304-3940(01)02141-3)
- 704 Jensen, O., & Mazaheri, A. (2010). Shaping functional architecture by oscillatory alpha activity:  
705 gating by inhibition. *Frontiers in human neuroscience*, 4, 186.  
706 <https://doi.org/10.3389/fnhum.2010.00186>
- 707 Klimesch, W., Sauseng, P., & Hanslmayr, S. (2007). EEG alpha oscillations: The inhibition-timing  
708 hypothesis. *Brain Res Rev* 53:63–88. <https://doi.org/10.1016/j.brainresrev.2006.06.003>
- 709 Kwak, Y. T. (2006). Quantitative EEG Findings in Different Stages of Alzheimer’s Disease. *Journal*  
710 *of Clinical Neurophysiology*, 23(5), 457–462.  
711 <https://doi.org/10.1097/01.wnp.0000223453.47663.63>
- 712 Lang, P. J., Margaret, M. M., & Cuthbert, B. N. (2008). *International affective picture system*  
713 *(IAPS): Affective ratings of pictures and instruction manual. Technical Report A-8*. Gainesville,  
714 FL.
- 715 Lőrincz, M. L., Kékesi, K. A., Juhász, G., Crunelli, V., & Hughes, S. W. (2009). Temporal framing  
716 of thalamic relay-mode firing by phasic inhibition during the alpha rhythm. *Neuron*, 63(5), 683-  
717 696. <https://doi.org/10.1016/j.neuron.2009.08.012>
- 718 Manard, M., François, S., Phillips, C., Salmon, E. & Collette, F. (2017). The neural bases of  
719 proactive and reactive control processes in normal aging. *Behav Brain Res* 320:504–516.  
720 <https://doi.org/10.1016/j.bbr.2016.10.026>
- 721 Mathewson, K.E., Gratton, G., Fabiani, M., Beck, D.M., & Ro, T. (2009). To see or not to see: Pre-  
722 stimulus alpha phase predicts visual awareness. *The Journal of Neuroscience*, 29(8), 2725-2732.  
723 <https://doi.org/10.1523/JNEUROSCI.3963-08.2009>
- 724 Mathewson, K.E., Lleras, A., Beck D.M., Fabiani, M., Ro, T., & Gratton, G. (2011). Pulsed out of  
725 awareness: EEG alpha oscillations represent a pulsed-inhibition of ongoing cortical processing.  
726 *Frontiers in Psychology*, 19;2:99. <https://doi.org/10.3389/fpsyg.2011.0009F>
- 727 Mathewson, K. E., Basak, C., Maclin, E. L., Low, K. A., Boot, W. R., Kramer, A. F., ... Gratton, G.  
728 (2012). Different slopes for different folks: Alpha and delta EEG power predict subsequent  
729 video game learning rate and improvements in cognitive control tasks. *Psychophysiology*,  
730 49(12), 1558–1570. <https://doi.org/10.1111/j.1469-8986.2012.01474.x>

## Resting-state EEG and cognitive control

- 731 Mayeux, R., Stern, Y., Rosen, J., & Leventhal, J. (1981). Depression, intellectual impairment, and  
732 Parkinson disease. *Neurology*, *31*(6), 645–645. <https://doi.org/10.1212/WNL.31.6.645>
- 733 Miller, K. J., Honey, C. J., Hermes, D., & Ojemann, J. G. (2015). Broadband changes in the cortical  
734 surface potential track activation of functionally diverse neuronal populations, *85*(0 2), 711–720.  
735 <https://doi.org/10.1080/00672700609480433>
- 736 Miyake, A., & Friedman, N. P. (2012). The Nature and Organization of Individual Differences in  
737 Executive Functions. *Current Directions in Psychological Science*, *21*(1), 8–14.  
738 <https://doi.org/10.1177/0963721411429458>
- 739 Moretti, D. V., Babiloni, C., Binetti, G., Cassetta, E., Dal Forno, G., Ferreric, F., ... Rossini, P. M.  
740 (2004). Individual analysis of EEG frequency and band power in mild Alzheimer's disease.  
741 *Clinical Neurophysiology*, *115*(2), 299–308. [https://doi.org/10.1016/S1388-2457\(03\)00345-6](https://doi.org/10.1016/S1388-2457(03)00345-6)
- 742 Morrell, F., & Ross, M. H. (1953). Central inhibition in cortical conditioned reflexes. *AMA Archives*  
743 *of Neurology & Psychiatry*, *70*(5), 611-616.  
744 <https://doi.org/10.1001/archneurpsyc.1953.02320350063006>
- 745 Nikulin, V. V., & Brismar, T. (2006). Phase synchronization between alpha and beta oscillations in  
746 the human electroencephalogram. *Neuroscience*, *137*(2), 647–657.  
747 <https://doi.org/10.1016/j.neuroscience.2005.10.031>
- 748 Ouyang, G., Hildebrandt, A., Schmitz, F., & Herrmann, C. S. (2020). Decomposing alpha and 1/f  
749 brain activities reveals their differential associations with cognitive processing speed.  
750 *NeuroImage*, *205*, 116304. <https://doi.org/10.1016/j.neuroimage.2019.116304>
- 751 Oswald, V., Zerouali, Y., Boulet-Craig, A., Krajcinovic, M., Laverdière, C., Sinnott, D., Jolicoeur, P.,  
752 Lippé, S., Jerbi, K., & Robaey, P. (2017). *Cortex*, *97*, 109-124.  
753 <https://doi.org/10.1016/j.cortex.2017.09.021>
- 754 Peltz, C.B., Gratton, G., & Fabiani, M. (2011). Age-related changes in electrophysiological and  
755 neuropsychological indices of working memory, attention control, and cognitive flexibility.  
756 *Frontiers in Psychology*, *2*, 1-12. <https://doi.org/10.3389/fpsyg.2011.00190>
- 757 Pertermann, M., Mückschel, M., Adelhöfer, N., Ziemssen, T., & Beste, C. (2019). On the  
758 interrelation of 1/ f neural noise and norepinephrine system activity during motor response  
759 inhibition . *Journal of Neurophysiology*, *121*(5), 1633–1643.  
760 <https://doi.org/10.1152/jn.00701.2018>
- 761 Polich, J. (1997). EEG and ERP assessment of normal aging. *Electroencephalography and Clinical*  
762 *Neurophysiology - Evoked Potentials*, *104*(3), 244–256. [https://doi.org/10.1016/S0168-5597\(97\)96139-6](https://doi.org/10.1016/S0168-5597(97)96139-6)
- 764 Prichep, L. S., John, E. R., Ferris, S. H., Rausch, L., Fang, Z., Cancro, R., ... Reisberg, B. (2006).  
765 Prediction of longitudinal cognitive decline in normal elderly with subjective complaints using  
766 electrophysiological imaging. *Neurobiology of Aging*, *27*(3), 471–481.  
767 <https://doi.org/10.1016/j.neurobiolaging.2005.07.021>
- 768 Pscherer, C., Mückschel, M., Summerer, L., Bluschke, A., & Beste, C. (2019). On the relevance of



- 769 EEG resting theta activity for the neurophysiological dynamics underlying motor inhibitory  
770 control. *Human Brain Mapping*, 40(14), 4253–4265. <https://doi.org/10.1002/hbm.24699>
- 771 Robertson, M. M., Furlong, S., Voytek, B., Donoghue, T., Boettiger, C. A., & Sheridan, M. A.  
772 (2019). EEG power spectral slope differs by ADHD status and stimulant medication exposure in  
773 early childhood. *Nervous System Pathophysiology*, 122, 2427–2437.  
774 <https://doi.org/10.1152/jn.00388.2019>
- 775 Sauseng, P., Klimesch, W., Schabus, M., & Doppelmayr, M. (2005). Fronto-parietal EEG coherence  
776 in theta and upper alpha reflect central executive functions of working memory. *International  
777 Journal of Psychophysiology*, 57, 97–103. <https://doi.org/10.1016/j.ijpsycho.2005.03.018>
- 778 Simon, J. R. (1969). Reactions toward the source of stimulation. *Journal of Experimental  
779 Psychology*, 81(1), 174–176. <https://doi.org/10.1037/h0027448>
- 780 Townsend, J. T., & Ashby, F. G. (1978). Methods of Modeling Capacity in Simple Processing  
781 Systems. In N. J. Castellan & F. Restle (Eds.), *Cognitive Theory Vol. 3* (pp. 200–239). Hillsdale,  
782 NJ: Erlbaum.
- 783 Townsend, J. T., & Ashby, F. G. (1983). *Stochastic modeling of elementary psychological processes*.  
784 Cambridge, MA: Cambridge University Press.
- 785 Ullsperger, M., Bylsma, L. M., & Botvinick, M. M. (2005). The conflict adaptation effect: It's not  
786 just priming. *Cognitive, Affective and Behavioral Neuroscience*, 5(4), 467–472.  
787 <https://doi.org/10.3758/CABN.5.4.467>
- 788 van Driel, J., Ridderinkhof, R.K., & Cohen, M. X. (2012). Not all errors are alike: Theta and alpha  
789 EEG dynamics relate to differences in error-processing dynamics. *Journal of Neuroscience*,  
790 32(47), 16795–16806. <https://doi.org/10.1523/JNEUROSCI.0802-12.2012>
- 791 Vissers, M. E., van Driel, J., & Slagter, H. A. (2016). Proactive, but not reactive filtering relies on  
792 local modulation of alpha oscillatory activity. *Journal of Cognitive Neuroscience*, 28(12), 1964–  
793 1979. <https://doi.org/10.1162/jocn>
- 794 Voytek, B., & Knight, R. T. (2015). Dynamic network communication as a unifying neural basis for  
795 cognition, development, aging, and disease. *Biological Psychiatry*, 77(12), 1089–1097.  
796 <https://doi.org/10.1016/j.biopsych.2015.04.016>
- 797 Voytek, B., Kramer, M. A., Case, J., Lepage, K. Q., Tempesta, Z. R., Knight, R. T., & Gazzaley, A.  
798 (2015). Age-Related Changes in 1/f Neural Electrophysiological Noise. *Journal of  
799 Neuroscience*, 35(38), 13257–13265. <https://doi.org/10.1523/JNEUROSCI.2332-14.2015>
- 800 Williamson, S. J., Kaufman, L., Lu, Z. L., Wang, J. Z., & Karron, D. (1997). Study of human  
801 occipital alpha rhythm: the alphon hypothesis and alpha suppression. *International journal of  
802 psychophysiology*, 26(1-3), 63-76. [https://doi.org/10.1016/s0167-8760\(97\)00756-3](https://doi.org/10.1016/s0167-8760(97)00756-3)
- 803 Woltering, S., Jung, J., Liu, Z., & Tannock, R. (2012). Resting-state EEG oscillatory power  
804 differences in ADHD college students and their peers. *Behavioral and Brain Functions*, 8.  
805 <https://doi.org/10.1186/1744-9081-8-60>
- 806 Wöstmann, M., Alavash, M., & Obleser, J. (2019). Alpha Oscillations in the Human Brain

## Resting-state EEG and cognitive control

- 807 Implement Distractor Suppression Independent of Target Selection. *The Journal of*  
808 *Neuroscience : The Official Journal of the Society for Neuroscience*, 39(49), 9797–9805.  
809 <https://doi.org/10.1523/JNEUROSCI.1954-19.2019>
- 810 Yesavage, J. A., Brink, T. L., Rose, T. L., Virwnia, H. ; Adfy, M., & Leirer, V. O. (1983).  
811 Development and validation of a geriatric depression screening scale: A preliminary report. *J.*  
812 *psychial. Rex* (Vol. 17). [https://doi.org/10.1016/0022-3956\(82\)90033-4](https://doi.org/10.1016/0022-3956(82)90033-4)
- 813 Yesavage, J. A., & Sheikh, J. I. (1986). Geriatric Depression Scale (GDS): Recent evidence and  
814 development of a shorter version. *Clinical Gerontologist*, 2(1–2), 165–173.  
815 [https://doi.org/10.1300/j018v05n01\\_09](https://doi.org/10.1300/j018v05n01_09)
- 816
- 817

818 Table 1

819 *Descriptive characteristics of the sample. Mean (SD).*

820

|                            | <b>Younger Adults</b> | <b>Older Adults</b> | <b><i>p</i>-value</b> |
|----------------------------|-----------------------|---------------------|-----------------------|
| N                          | 20 (14 females)       | 19 (11 females)     |                       |
| Age (years)                | 22.4 (3.3)            | 69.4 (4.3)          | < .001                |
| Education (years)          | 15.6 (2.4)            | 17.3 (2.4)          | .038                  |
| IQ (age-adjusted)*         | 115.2 (10.7)          | 124.0 (15.4)        | .030                  |
| Shipley's Vocabulary Scale | 31.4 (3.4)            | 36.1 (3.2)          | < .001                |

821

822 \**Kaufman Brief Intelligence Test – 2<sup>nd</sup> edition*

823

824

## Resting-state EEG and cognitive control

### Figure Legends

825

826 **Figure 1: Detrending Procedure:** Raw power spectrum (solid black line), with the characteristic  $1/f$   
827 phenomenon across the spectrum. The  $1/f$  phenomenon was modeled excluding the frequencies 4-  
828 13 Hz (dashed black line) and was subtracted from the raw power spectrum, resulting in the  
829 detrended power spectrum (solid blue line). Alpha and theta measurements were made on the  
830 detrended power spectrum.

831 **Figure 2: Detrended Power Spectra:** Detrended power spectra at the parietal (A-B) and frontocentral  
832 (C-D) electrode clusters with eyes closed (A, C) and eyes open (B, D). Shaded gray areas indicate  
833 +/- the standard error. Note that younger adults had greater alpha power than older adults with both  
834 eyes open and eyes closed. However, theta power was not significantly different between younger  
835 and older adults. Both alpha and theta powers were reduced by opening the eyes.

836 **Figure 3: Topographic maps of alpha, theta, and  $1/f$  slope:** Alpha and theta amplitude, and  $1/f$  slope  
837 with eyes open (top) and closed (bottom) are shown for both younger and older adults. Amplitude  
838 was used instead of power because power differences between younger and older adults were too  
839 large to be plotted meaningfully using the same scale.

840 **Figure 4: Relationship between EEG and cognitive control:** (A) Scatterplot of parietal alpha power  
841 with the conflict expectation effect (CEE) on the inverse efficiency score (IES). The greater the  
842 alpha power, the more these individuals used the cue information (proactive control). (B)  
843 Scatterplot of frontocentral theta power with the congruency effect (CE) on error rate. The greater  
844 the theta power at rest, the greater the distractor interference (reactive control). (C) Scatterplot of  
845 frontocentral  $1/f$  slope with the CEE on error rate. The steeper the  $1/f$  slope, the more these  
846 individuals used the cue information (proactive control).

847

848

849

850

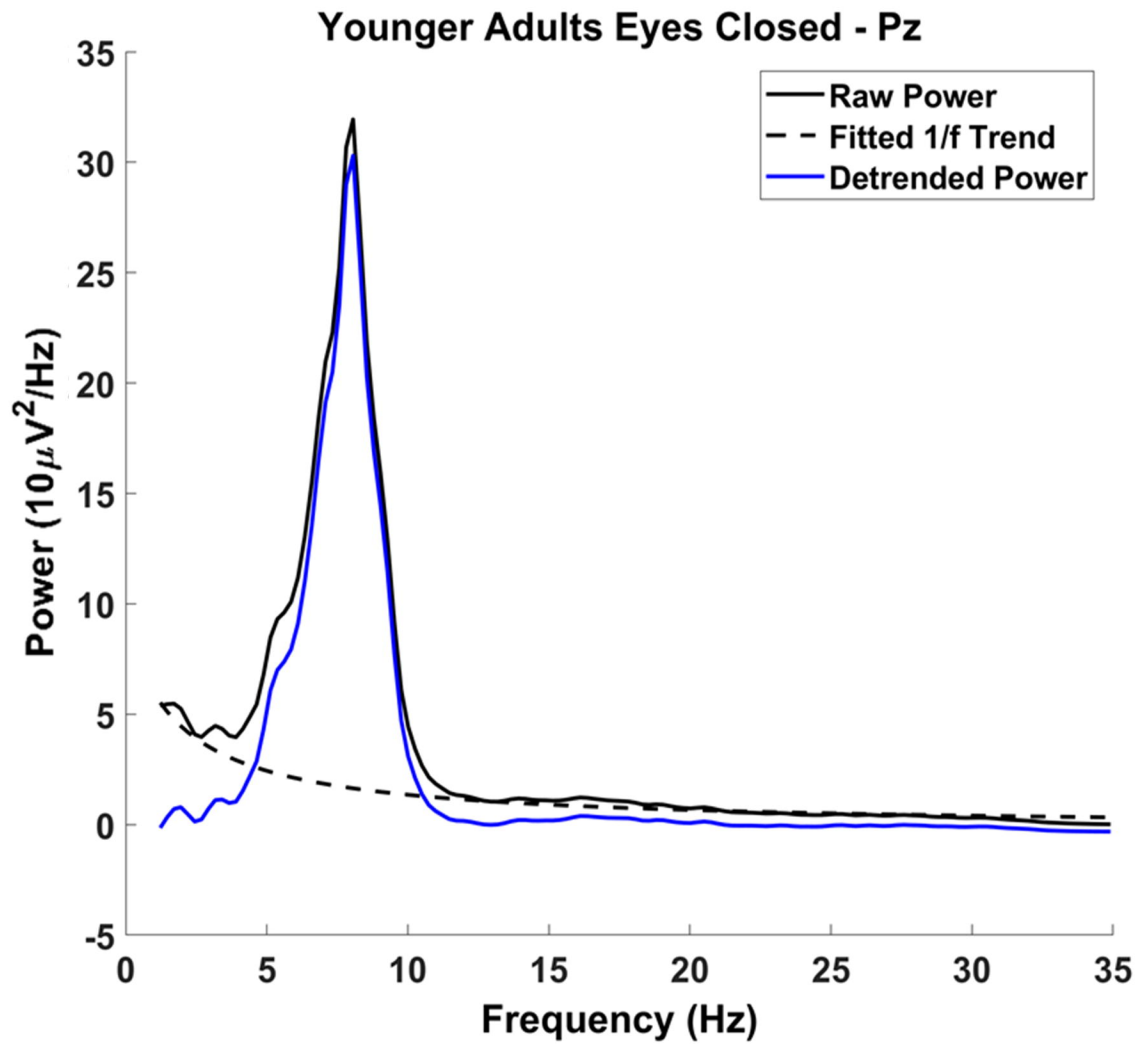

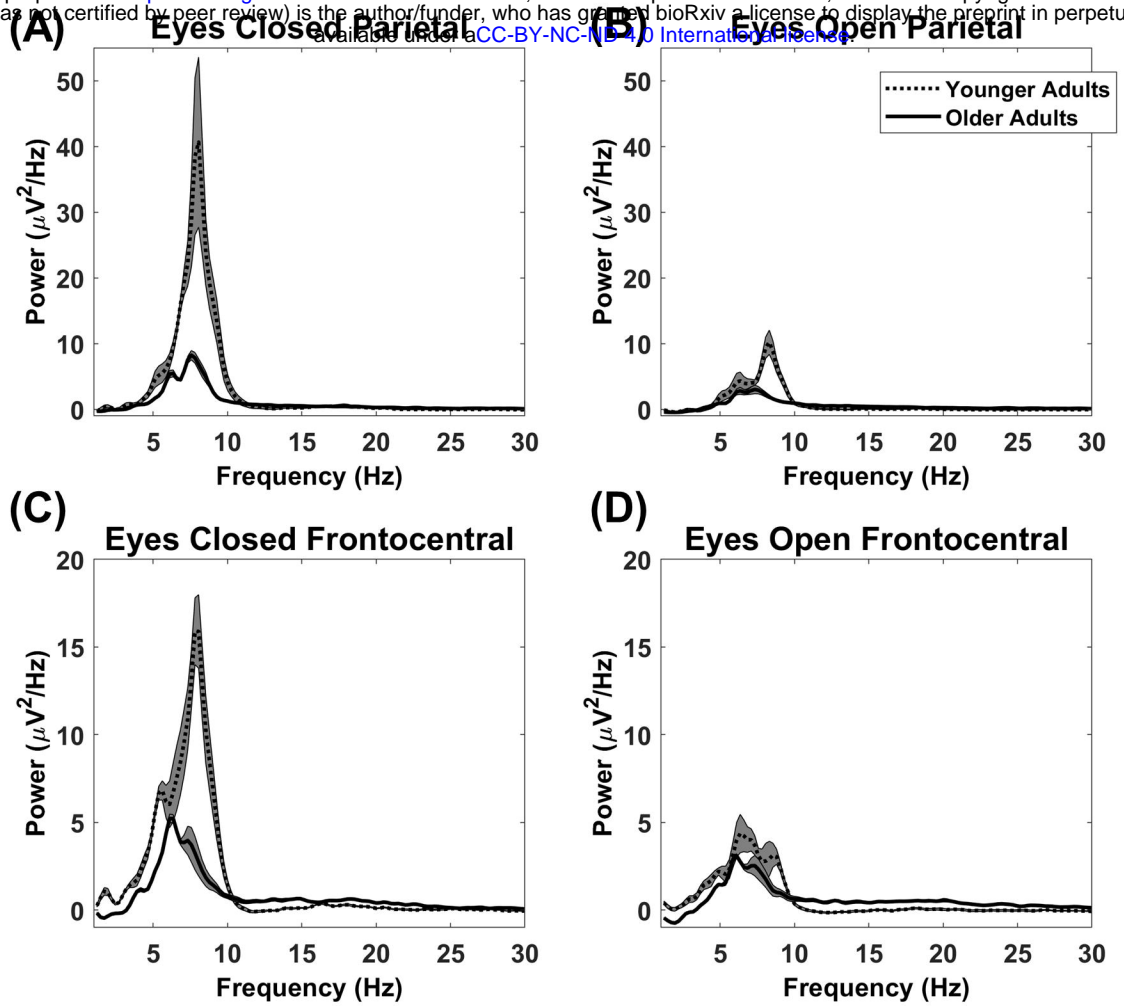

# Eyes Open

bioRxiv preprint doi: <https://doi.org/10.1101/2020.04.09.033811>; this version posted October 26, 2020. The copyright holder for this preprint (which was not certified by peer review) is the author/funder, who has granted bioRxiv a license to display the preprint in perpetuity. It is made available under aCC-BY-NC-ND 4.0 International license.

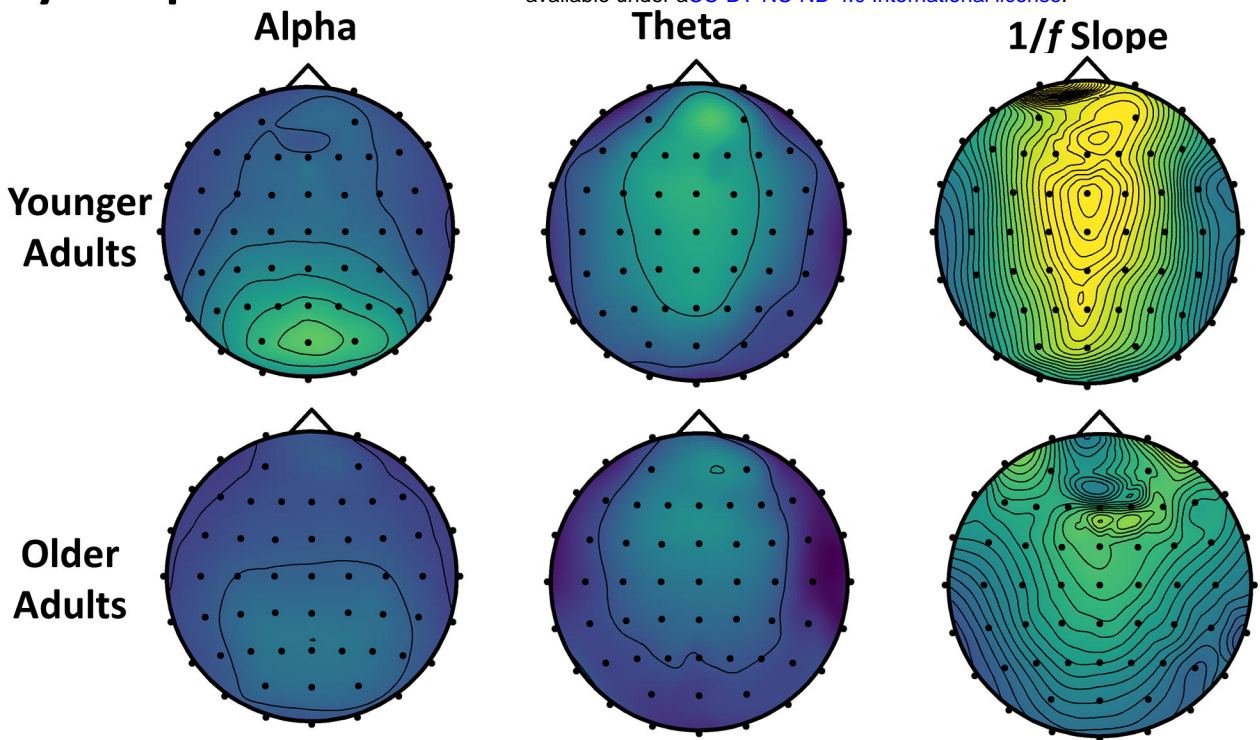

# Eyes Closed

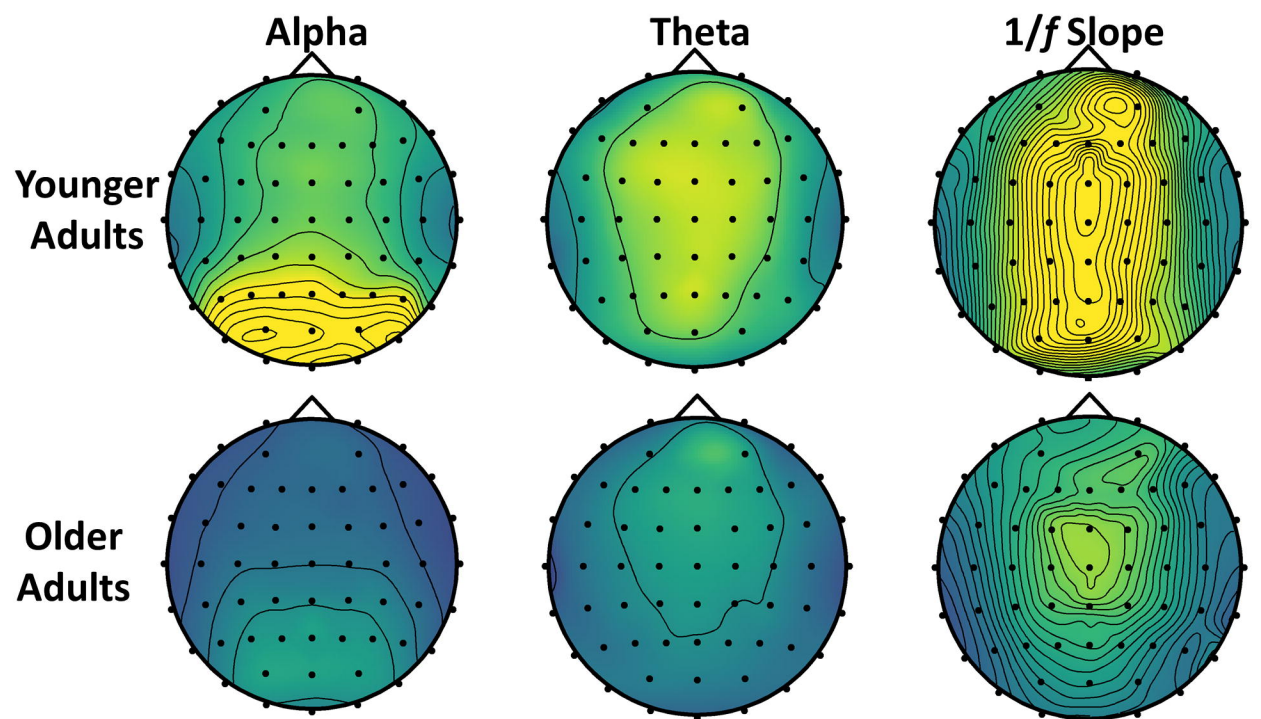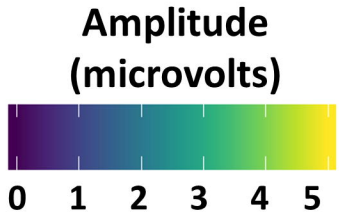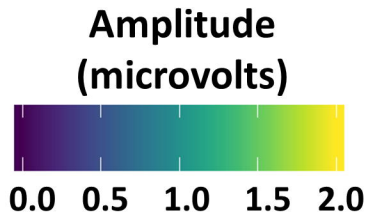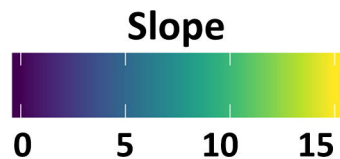

# A) Alpha Power and Conflict Expectation Effect

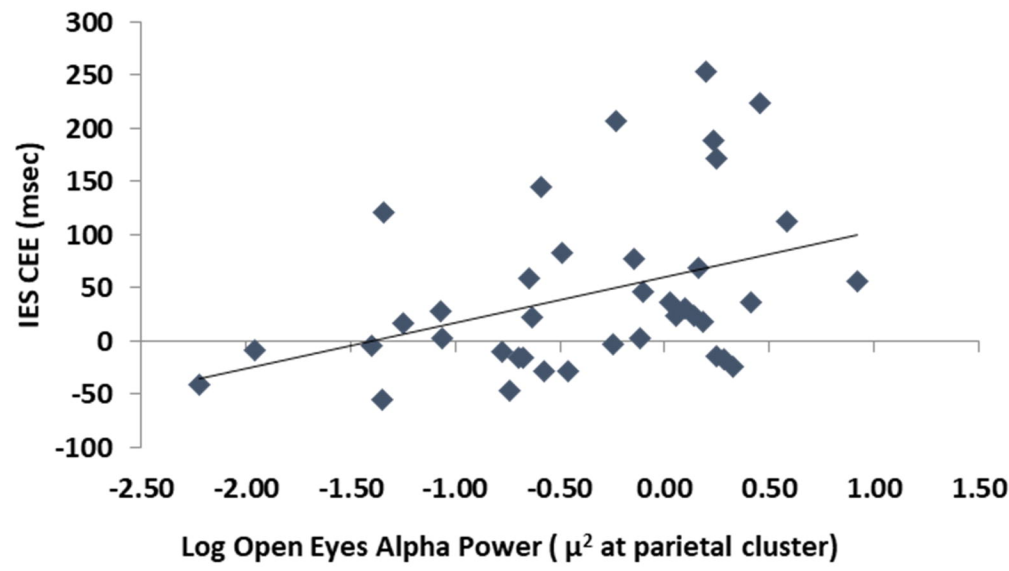

# B) Theta Power and Congruency Effect

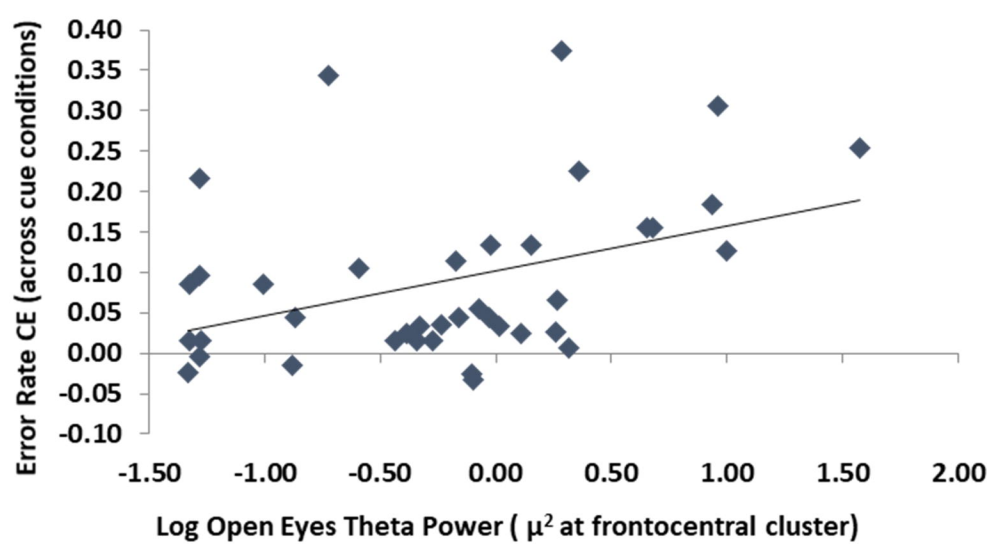

# C) 1/f slope and Conflict Expectation Effect

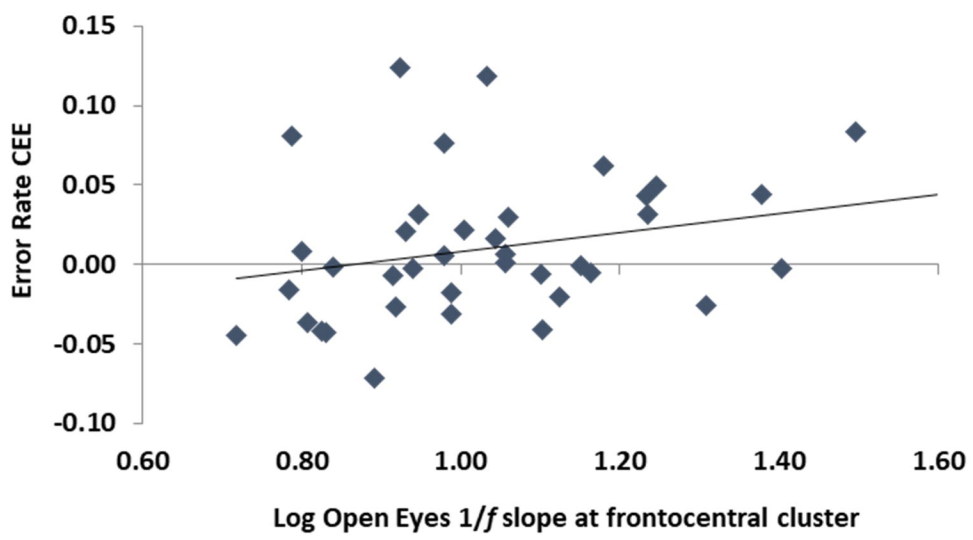

Source: https://www.biorxiv.org/content/10.1101/2020.04.09.033811v2.full.pdf
